# Supplementary material
Source: PubMed Central journal article supplement (PMC10479874)

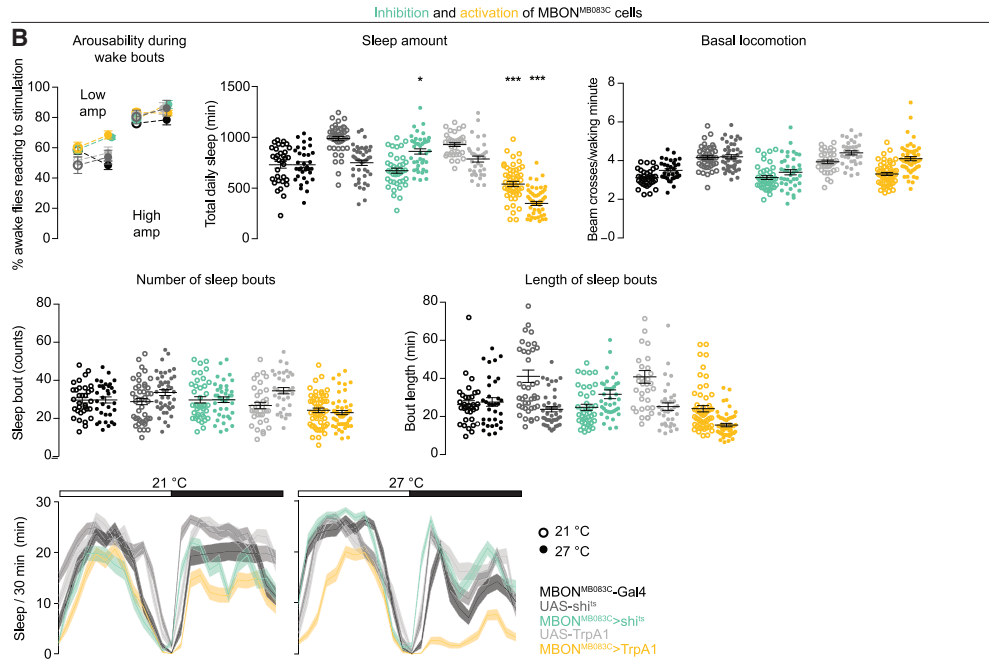

Figure S7B. (corrected)

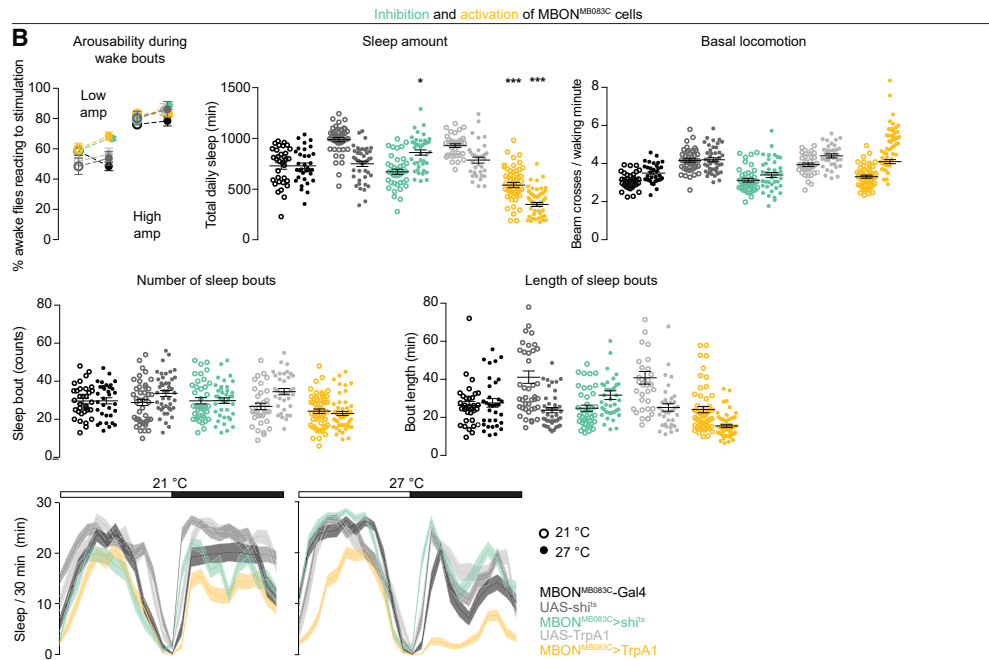

Figure S7B. (original)

Supplement: NIHMS1897698-supplement-1.pdf [file NIHMS1897698-supplement-1.pdf]
